# Supplementary material for: Pulmonary retention of primed neutrophils: a novel protective host response, which is impaired in the acute respiratory distress syndrome
Source: HighWire-hosted journal article supplement (doi:10.1136/thoraxjnl-2013-204742), 2014-04-04

## SUPPLEMENTARY DATA

### Supplementary table 1

**Absolute values for forward scatter, and neutrophil cell surface expression of CD11b and CD62L.**

|                          | Pre-operative controls | Sepsis                 | ARDS                   |
|--------------------------|------------------------|------------------------|------------------------|
| Venous forward scatter   | 247.2<br>(219.4-282.9) | 230.5<br>(214.1-265.1) | 254.1<br>(194.1-288.4) |
| Arterial forward scatter | 215.4<br>(208.8-262.2) | 223.3<br>(210.5-260.0) | 234.4<br>(198.6-369.1) |
| Venous CD62L (MFI)       | 119.2<br>(101.1-171.3) | 30.75<br>(19.48-100.2) | 28.85<br>(18.4-59.0)   |
| Arterial CD62L (MFI)     | 150.6<br>(104.8-190.8) | 37.95<br>(21.4-106.7)  | 27.05<br>(16.9-48.2)   |
| Venous CD11b (MFI)       | 40.73<br>(21.3-69.9)   | 62.72<br>(37.2-107.9)  | 64.2<br>(31.5-96.0)    |
| Arterial CD11b (MFI)     | 31.83<br>(18.8-65.3)   | 70.19<br>(40.3-102.3)  | 70.5<br>(32.6-92.3)    |

Data shown as median (interquartile range).

MFI – mean fluorescence intensity

## Figure legend for Supplementary figure 1

Paired samples of whole blood were obtained from the radial artery and internal jugular veins of a subject with sepsis secondary to Group A streptococcal bacteraemia who developed ARDS from day 2 onwards. Neutrophil cell surface expression of CD62L was measured using no lysis whole blood flow cytometry. Gradients were expressed as the ratio of the arterial value over the venous value. Supplementary figure 1 shows the changes in the CD62L gradient over time. P/F ratio is the partial pressure of oxygen in arterial blood / fraction of inspired oxygen.

Summers et al  
Supplementary figure 1

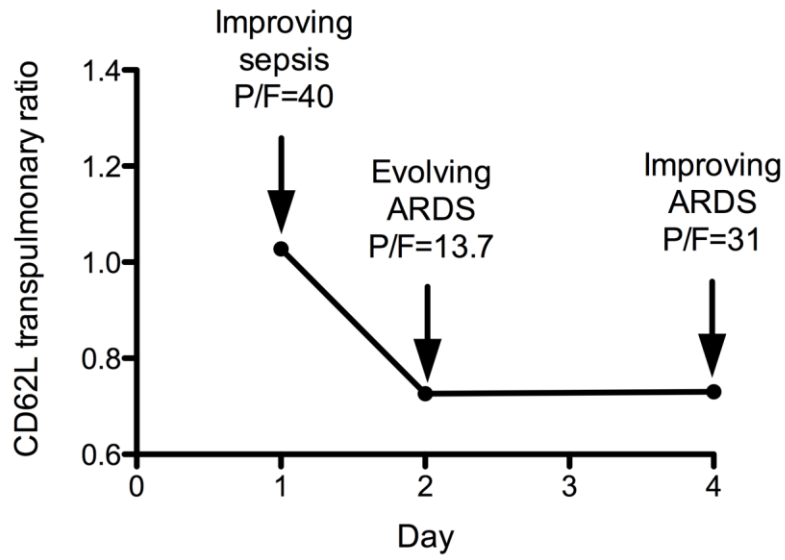

Supplement: thoraxjnl-2013-204742supp.pdf [file thoraxjnl-2013-204742supp.pdf]
